# Supplementary material for: The Admission (Neutrophil+Monocyte)/Lymphocyte Ratio Is an Independent Predictor for In-Hospital Mortality in Patients With Acute Myocardial Infarction
Source: PubMed Central journal article supplement (PMC9021423; doi:10.3389/fcvm.2022.870176), 2022-04-07
Supplement: Data_Sheet_1.pdf [file Data_Sheet_1.pdf]

## Supplementary Tables List

Supplementary Table 1: Baseline characteristics of the studied samples.

|                                    | All patients<br>n=2155 | Survivor<br>n=1853  | Non-survivor<br>n=302 | P value        |
|------------------------------------|------------------------|---------------------|-----------------------|----------------|
| Patients                           | n=2155                 | n=1853              | n=302                 | -              |
| <b>Demographics</b>                |                        |                     |                       |                |
| Age (years)                        | 70.71 (62.20-79.36)    | 70.18 (61.93-78.37) | 74.51 (66.71-84.38)   | < <b>0.001</b> |
| Gender (male, n[%])                | 1445 [67.05%]          | 1259 [67.94%]       | 186 [61.59%]          | <b>0.029</b>   |
| Ethnicity (white, n[%])            | 1354 [62.83%]          | 1176 [63.46%]       | 178 [58.94%]          | 0.131          |
| BMI (kg/m <sup>2</sup> )           | 28.10 (25.59-31.07)    | 28.10 (25.74-31.08) | 28.10 (25.09-31.00)   | 0.637          |
| Marital status (married, n[%])     | 1037 [48.12%]          | 917 [49.49%]        | 120 [39.74%]          | <b>0.002</b>   |
| Admission type (emergency, n[%])   | 719 [33.36%]           | 569 [30.71%]        | 150 [49.67%]          | < <b>0.001</b> |
| <b>Comorbidities</b>               |                        |                     |                       |                |
| Hypertension (n[%])                | 909 [42.18%]           | 829 [44.74%]        | 80 [26.49%]           | < <b>0.001</b> |
| Cardiac arrhythmia (n[%])          | 1199 [55.64%]          | 979 [52.83%]        | 220 [72.85%]          | < <b>0.001</b> |
| Congestive heart failure (n[%])    | 1122 [52.06%]          | 932 [50.30%]        | 190 [62.91%]          | < <b>0.001</b> |
| Valvular disease (n[%])            | 515 [23.90%]           | 437 [23.58%]        | 78 [25.83%]           | 0.396          |
| Pulmonary hypertension (n[%])      | 97 [4.50%]             | 71 [3.83%]          | 26 [8.61%]            | < <b>0.001</b> |
| Chronic pulmonary disease (n[%])   | 541 [25.10%]           | 445 [24.02%]        | 96 [31.79%]           | <b>0.004</b>   |
| Peripheral vascular disease (n[%]) | 338 [15.68%]           | 272 [14.68%]        | 66 [21.85%]           | <b>0.001</b>   |
| Cerebrovascular diseases (n[%])    | 275 [12.76%]           | 217 [11.71%]        | 58 [19.21%]           | < <b>0.001</b> |
| Diabetes mellitus (n[%])           | 940 [43.62%]           | 807 [43.55%]        | 133 [44.04%]          | 0.874          |
| Renal disease (n[%])               | 627 [29.10%]           | 508 [27.42%]        | 119 [39.40%]          | < <b>0.001</b> |
| Severe liver disease (n[%])        | 46 [2.13%]             | 24 [1.30%]          | 22 [7.28%]            | < <b>0.001</b> |
| Charlson comorbidity index         | 7 (5-9)                | 6 (5-8)             | 8 (6-10)              | < <b>0.001</b> |
| <b>Laboratory variables</b>        |                        |                     |                       |                |
| NMLR                               | 6.88 (4.19-12.27)      | 6.30(3.93-11.04)    | 12.10 (7.23-21.20)    | < <b>0.001</b> |
| WBC (K/ $\mu$ L)                   | 12.20 (8.90-16.30)     | 11.90 (8.70-15.75)  | 14.30 (10.60-19.63)   | < <b>0.001</b> |
| Monocyte (K/ $\mu$ L)              | 1.20 (0.60-40.00)      | 1.14 (0.58-39.64)   | 1.57 (0.79-41.74)     | <b>0.004</b>   |
| Neutrophil (K/ $\mu$ L)            | 15.09 (8.71-793.46)    | 14.72 (8.43-784.90) | 18.12 (10.70-954.96)  | <b>0.001</b>   |
| Lymphocyte (K/ $\mu$ L)            | 2.57 (1.32-107.52)     | 2.69 (1.34-114.52)  | 1.75 (0.86-83.19)     | < <b>0.001</b> |
| Platelet (K/ $\mu$ L)              | 206 (164-259)          | 206 (167-256)       | 205 (148-342)         | 0.620          |
| Hematocrit (K/ $\mu$ L)            | 36.0 (31.2-40.5)       | 36.4 (31.6-40.6)    | 33.7 (29.6-38.3)      | < <b>0.001</b> |
| Hemoglobin (K/ $\mu$ L)            | 11.9 (10.2-13.4)       | 12.0 (10.3-13.5)    | 10.9 (9.5-12.3)       | < <b>0.001</b> |
| MCH (pg)                           | 30.2 (28.9-31.4)       | 30.2 (29.0-31.4)    | 30.0 (28.5-31.2)      | <b>0.038</b>   |
| MCHC (%)                           | 33.0 (32.0-33.9)       | 33.0 (32.1-34.0)    | 32.3 (31.2-33.2)      | < <b>0.001</b> |
| MCV (fL)                           | 91 (88-95)             | 91 (88-94)          | 93 (88-97)            | <b>0.001</b>   |
| RBC (m/uL)                         | 3.99 (3.40-4.52)       | 4.00 (3.46-4.53)    | 3.69 (3.14-4.22)      | < <b>0.001</b> |
| RDW (%)                            | 13.9 (13.2-15.0)       | 13.8 (13.2-14.7)    | 14.6 (13.7-16.5)      | < <b>0.001</b> |
| Troponin T (ng/mL)                 | 0.93 (0.22-1.69)       | 0.94 (0.22-1.69)    | 0.90 (0.21-1.69)      | 0.990          |
| CKMB (ng/mL)                       | 13.0 (7.0-26.0)        | 13.0 (7.0-24.0)     | 13.0 (7.0-42.0)       | <b>0.015</b>   |
| Anion Gap (mEq/L)                  | 15 (13-18)             | 15 (13-17)          | 17 (15-21)            | < <b>0.001</b> |
| Bicarbonate (mEq/L)                | 23 (20-26)             | 24 (21-26)          | 21 (18-24)            | < <b>0.001</b> |
| BUN (mg/dL)                        | 22 (16-35)             | 21 (15-31)          | 32 (20-52)            | < <b>0.001</b> |
| Calcium (mg/dL)                    | 8.6 (8.3-9.0)          | 8.6 (8.4-9.0)       | 8.3 (7.7-8.7)         | < <b>0.001</b> |
| Chloride (mEq/L)                   | 103 (100-106)          | 103 (100-106)       | 102 (97-106)          | <b>0.001</b>   |
| Creatinine (mg/dL)                 | 1.1 (0.9-1.6)          | 1.1 (0.8-1.5)       | 1.6 (1.1-2.3)         | < <b>0.001</b> |
| Glucose (mg/dL)                    | 136 (110-187)          | 136 (108-178)       | 164 (122-229)         | < <b>0.001</b> |

|                             |                     |                     |                     |                   |
|-----------------------------|---------------------|---------------------|---------------------|-------------------|
| Sodium (mEq/L)              | 139 (136-141)       | 139 (136-141)       | 138 (135-141)       | <b>0.016</b>      |
| Potassium (mEq/L)           | 4.2 (3.9-4.5)       | 4.2 (3.9-4.5)       | 4.3 (3.8-4.9)       | <b>&lt; 0.001</b> |
| <b>Vital signs</b>          |                     |                     |                     |                   |
| SBP (mmHg)                  | 118 (105-132)       | 118 (105-132)       | 118 (104-133)       | 0.421             |
| DBP (mmHg)                  | 63 (55-74)          | 63 (54-74)          | 63 (55-75)          | 0.455             |
| MBP (mmHg)                  | 80 (71-92)          | 80 (71-92)          | 80 (69-90)          | 0.421             |
| Heart rate (bpm)            | 83 (74-95)          | 82 (74-93)          | 91 (78-106)         | <b>&lt; 0.001</b> |
| Respiratory rate (insp/min) | 18 (15-22)          | 17 (15-21)          | 21 (17-25)          | <b>&lt; 0.001</b> |
| Temperature (°C)            | 36.61 (36.39-36.94) | 36.61 (36.39-36.94) | 36.61 (36.28-36.89) | 0.417             |
| SpO <sub>2</sub> (%)        | 98 (95-100)         | 99 (96-100)         | 97 (94-100)         | <b>&lt; 0.001</b> |
| <b>Scoring systems</b>      |                     |                     |                     |                   |
| SOFA                        | 5 (3-8)             | 5 (3-8)             | 9 (6-13)            | <b>&lt; 0.001</b> |
| SIRS                        | 3 (2-3)             | 3 (2-3)             | 3 (3-4)             | <b>&lt; 0.001</b> |
| <b>Treatments</b>           |                     |                     |                     |                   |
| PCI (n[%])                  | 448 [20.8%]         | 392 [21.2%]         | 56 [18.5%]          | 0.300             |
| CABG (n[%])                 | 916 [42.5%]         | 890 [48.0%]         | 26 [8.6%]           | <b>&lt; 0.001</b> |
| IABP (n[%])                 | 320 [14.8%]         | 265 [14.3%]         | 55 [18.2%]          | 0.076             |
| RRT (n[%])                  | 208 [9.7%]          | 118 [6.4%]          | 90 [29.8%]          | <b>&lt; 0.001</b> |

BMI: body mass index; WBC: white blood cell; NMLR: (neutrophil + monocyte)/ lymphocyte ratio; MCH: mean corpuscular hemoglobin; MCHC: mean corpuscular hemoglobin concentration; MCV: mean corpuscular volume; RBC: red blood cell; RDW: red cell distribution width; CKMB: creatine kinase - MB isoenzyme; BUN: blood urea nitrogen; SBP: systolic blood pressure; DBP: diastolic blood pressure; MBP: mean blood pressure; SpO<sub>2</sub>: pulse oxygen saturation; SOFA: Sequential Organ Failure Assessment score; SIRS: Systemic Inflammatory Response Syndrome score; PCI: percutaneous coronary intervention; CABG: coronary artery bypass graft; IABP: intra-aortic balloon pump; RRT: renal replacement therapy.

**Supplementary Table 2: Univariate and multivariate analysis of prognostic variables.**

| Prognostic variables        | Univariate analysis    |         | Multivariate analysis  |                  |
|-----------------------------|------------------------|---------|------------------------|------------------|
|                             | HR (95%CI)             | Pvalue  | HR (95%CI)             | Pvalue           |
| <b>Demographics</b>         |                        |         |                        |                  |
| Age                         | 1.0248 (1.0146-1.0351) | < 0.001 | 1.0334 (1.0227-1.0442) | <b>&lt;0.001</b> |
| Gender (male)               | 0.8210 (0.6510-1.0355) | 0.096   |                        |                  |
| Ethnicity (white)           | 0.8594 (0.6829-1.0816) | 0.197   |                        |                  |
| Marital status (married)    | 1.0048 (0.9863-1.0236) | 0.61    | 0.9352 (0.7353-1.1895) | 0.585            |
| Admission type (emergency)  | 0.7514 (0.5965-0.9464) | 0.015   | 1.5732 (1.2404-1.9954) | <b>&lt;0.001</b> |
| BMI                         | 2.1978 (1.7523-2.7566) | < 0.001 |                        |                  |
| <b>Comorbidities</b>        |                        |         |                        |                  |
| Hypertension                | 0.6222 (0.4808-0.8051) | < 0.001 | 0.9004 (0.6874-1.1794) | 0.446            |
| Cardiac arrhythmia          | 1.6913 (1.3107-2.1824) | < 0.001 | 1.0769 (0.8241-1.4073) | 0.587            |
| Congestive heart failure    | 1.2086 (0.9553-1.5291) | 0.114   |                        |                  |
| Valvular disease            | 0.8483 (0.6549-1.0988) | 0.213   |                        |                  |
| Pulmonary hypertension      | 1.4203 (0.9488-2.1262) | 0.088   |                        |                  |
| Chronic pulmonary disease   | 1.3186 (1.0348-1.6802) | 0.025   | 1.1485 (0.8941-1.4752) | 0.278            |
| Peripheral vascular disease | 1.2818 (0.9750-1.6852) | 0.075   |                        |                  |
| Cerebrovascular disease     | 1.2184 (0.9135-1.6250) | 0.179   |                        |                  |
| Diabetes mellitus           | 0.9435 (0.7515-1.1845) | 0.617   |                        |                  |
| Renal disease               | 1.1757 (0.9314-1.4841) | 0.173   |                        |                  |
| Severe liver disease        | 2.4523 (1.5838-3.7971) | < 0.001 | 1.5088 (0.9378-2.4273) | 0.09             |
| Charlson comorbidity index  | 1.1123 (1.0665-1.1602) | < 0.001 | 0.9800 (0.9237-1.0398) | 0.505            |

**Laboratory variables**

|             |                        |         |                        |                  |
|-------------|------------------------|---------|------------------------|------------------|
| NMLR        | 1.0204 (1.0155-1.0253) | < 0.001 | 1.0088 (1.0029-1.0148) | <b>0.003</b>     |
| WBC         | 1.0103 (1.0047-1.0159) | < 0.001 | 1.0072 (0.9982-1.0163) | 0.114            |
| Monocyte    | 1.0029(1.0003-1.0056)  | 0.028   |                        |                  |
| Neutrophil  | 1.0002 (1.0001-1.0004) | < 0.001 |                        |                  |
| Lymphocyte  | 0.9997 (0.9984-1.0010) | 0.696   |                        |                  |
| Platelet    | 1.0002 (0.9990-1.0014) | 0.666   |                        |                  |
| Hematocrit  | 0.9855 (0.9692-1.0022) | 0.09    |                        |                  |
| Hemoglobin  | 0.9267 (0.8824-0.9732) | 0.002   |                        |                  |
| MCH         | 0.9888 (0.9449-1.0346) | 0.627   |                        |                  |
| MCHC        | 0.8177 (0.7607-0.8790) | < 0.001 | 0.8934 (0.8336-0.9574) | <b>0.001</b>     |
| MCV         | 1.0264 (1.0089-1.0443) | 0.003   |                        |                  |
| RBC         | 0.8274 (0.7181-0.9535) | 0.009   | 1.0061 (0.8525-1.1874) | 0.942            |
| RDW         | 1.0869 (1.0466-1.1287) | < 0.001 | 0.9923 (0.9432-1.0439) | 0.767            |
| Troponin T  | 1.0517 (1.0230-1.0812) | < 0.001 | 1.0181 (0.9824-1.0551) | 0.323            |
| CKMB        | 1.0026 (1.0015-1.0037) | < 0.001 | 1.0028 (1.0015-1.0040) | <b>&lt;0.001</b> |
| Anion Gap   | 1.0954 (1.0759-1.1152) | < 0.001 | 1.0139 (0.9895-1.0390) | 0.265            |
| Bicarbonate | 0.9124 (0.8916-0.9337) | < 0.001 | 1.0135 (0.9780-1.0504) | 0.459            |
| BUN         | 1.0132 (1.0094-1.0169) | < 0.001 | 1.0018 (0.9957-1.0080) | 0.548            |
| Calcium     | 0.6013 (0.5283-0.6842) | < 0.001 | 0.8128 (0.7073-0.9340) | <b>0.003</b>     |
| Chloride    | 0.9799 (0.9612-0.9990) | 0.04    | 0.9697 (0.9519-0.9878) | <b>0.001</b>     |
| Creatinine  | 1.1070 (1.0554-1.1611) | < 0.001 | 0.9474 (0.8785-1.0218) | 0.162            |
| Glucose     | 1.0026 (1.0018-1.0034) | < 0.001 | 1.0011 (1.0001-1.0020) | <b>0.026</b>     |
| Sodium      | 0.9801 (0.9576-1.0031) | 0.091   |                        |                  |
| Potassium   | 1.3468 (1.1634-1.5591) | < 0.001 | 1.0924 (0.9474-1.2598) | 0.224            |

**Vital signs**

|                  |                        |         |                        |              |
|------------------|------------------------|---------|------------------------|--------------|
| SBP              | 0.9993 (0.9941-1.0045) | 0.811   |                        |              |
| DBP              | 1.0041 (0.9975-1.0109) | 0.219   |                        |              |
| MBP              | 0.9990 (0.9928-1.0053) | 0.773   |                        |              |
| Heart rate       | 1.0136 (1.0078-1.0194) | < 0.001 | 1.0053 (0.9990-1.0116) | 0.096        |
| Respiratory rate | 1.0562 (1.0399-1.0726) | < 0.001 | 1.0261 (1.0070-1.0455) | <b>0.007</b> |
| Temperature      | 0.8099 (0.7111-0.9225) | 0.002   | 0.8291 (0.7434-0.9247) | <b>0.001</b> |
| SpO <sub>2</sub> | 0.9554 (0.9371-0.9741) | < 0.001 | 1.0042 (0.9808-1.0280) | 0.726        |

**Scoring systems**

|      |                        |         |                        |                  |
|------|------------------------|---------|------------------------|------------------|
| SOFA | 1.1509 (1.1215-1.1810) | < 0.001 | 1.0944 (1.0621-1.1276) | <b>&lt;0.001</b> |
| SIRS | 1.3573 (1.1884-1.5502) | < 0.001 | 1.0022 (0.8578-1.1707) | 0.978            |

**Treatments**

|      |                        |         |                        |                  |
|------|------------------------|---------|------------------------|------------------|
| PCI  | 1.1404 (0.8527-1.5252) | 0.376   |                        |                  |
| CABG | 0.1199 (0.0801-0.1795) | < 0.001 | 0.2213 (0.1452-0.3372) | <b>&lt;0.001</b> |
| IABP | 1.2937 (0.9657-1.7331) | 0.084   |                        |                  |
| RRT  | 2.2464 (1.7377-2.9039) | < 0.001 | 1.4453 (1.0847-1.9258) | <b>0.012</b>     |

BMI: body mass index; WBC: white blood cell; NMLR: (neutrophil + monocyte)/ lymphocyte ratio; MCH: mean corpuscular hemoglobin; MCHC: mean corpuscular hemoglobin concentration; MCV: mean corpuscular volume; RBC: red blood cell; RDW: red cell distribution width; CKMB: creatine kinase - MB isoenzyme; BUN: blood urea nitrogen; SBP: systolic blood pressure; DBP: diastolic blood pressure; MBP: mean blood pressure; SpO<sub>2</sub>: pulse oxygen saturation; SOFA: Sequential Organ Failure Assessment score; SIRS: Systemic Inflammatory Response Syndrome score; PCI: percutaneous coronary intervention; CABG: coronary artery bypass graft; IABP: intra-aortic balloon pump; RRT: renal replacement therapy.

Supplementary Table 3: Information of ROC curves in Supplementary Figure 1.

| Variables   | AUC   | 95%CI       | Cut-off value | Sensitivity | Specificity | Youden's index |
|-------------|-------|-------------|---------------|-------------|-------------|----------------|
| NMLR        | 0.711 | 0.680-0.741 | 8.522         | 0.689       | 0.648       | 0.336          |
| NLR         | 0.706 | 0.675-0.737 | 8.145         | 0.669       | 0.652       | 0.321          |
| WBC         | 0.617 | 0.581-0.652 | 13.600        | 0.560       | 0.631       | 0.191          |
| Monocytes   | 0.552 | 0.519-0.585 | 1.100         | 0.629       | 0.486       | 0.115          |
| Neutrophils | 0.561 | 0.528-0.595 | 14.070        | 0.619       | 0.480       | 0.099          |
| Lymphocytes | 0.595 | 0.559-0.632 | 1.770         | 0.650       | 0.503       | 0.154          |

NMLR: (neutrophil + monocyte)/ lymphocyte ratio; NLR: neutrophil to lymphocyte ratio; WBC: white blood cell.

## Supplementary Figures List

### Supplementary Figure 1

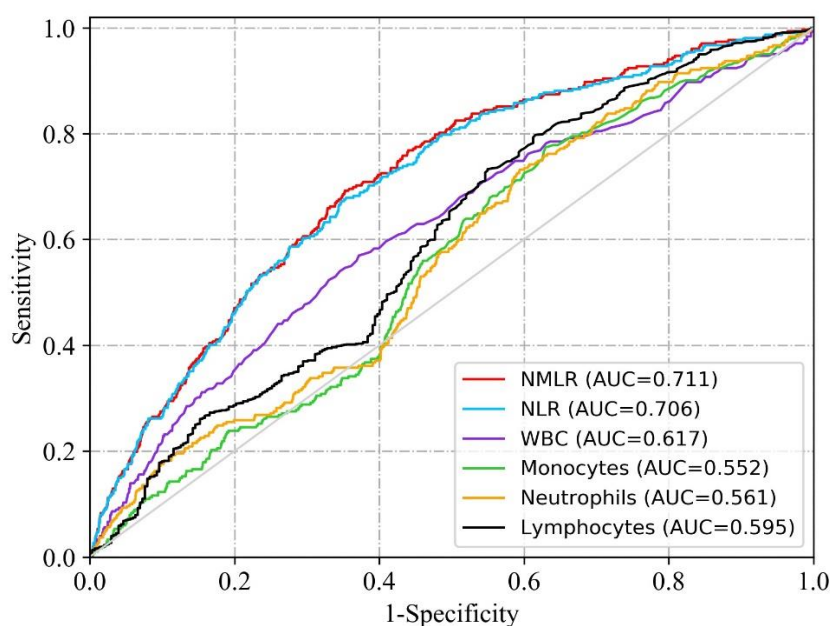

Supplementary Figure 1: ROC curves of indicators related to peripheral differential leukocyte counts for predicting in-hospital mortality.

The solid red line indicates the ROC curve of admission NMLR. The AUCs of admission NMLR and NLR were better than those of others. The follow-up DeLong's test revealed that the AUC of admission NMLR was significantly better than that of admission NLR [0.711 (95%CI: 0.680-0.741) vs. 0.706 (95%CI: 0.675-0.737),  $P < 0.05$ ].

NMLR: (neutrophil + monocyte)/ lymphocyte ratio; AUC: area under the curve; CI: confidence interval; ROC: receiver operator characteristic.

## Supplementary Figure 2

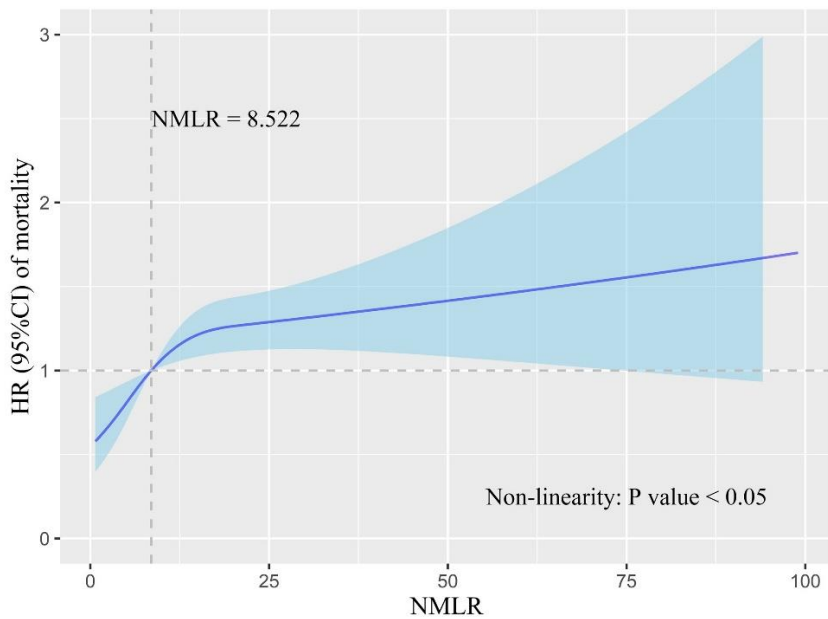

Supplementary Figure 2: Association of admission NMLR with in-hospital mortality risk.

HR is indicated by the solid blue line, and 95% CI is denoted by the shaded blue area. The model was adjusted for cofounders with a  $P$  value  $< 0.05$  in multivariate Cox analysis. The reference point (HR = 1) was the point where the admission NMLR value was 8.522. The  $P$  value for non-linearity was less than 0.05. HR increased with the increase in admission NMLR. However, the growth rate of HR slowed down after the admission NMLR exceeded 8.522.

NMLR: (neutrophil + monocyte)/ lymphocyte ratio; HR: hazard ratio; CI: confidence interval.

## Supplementary Figure 3

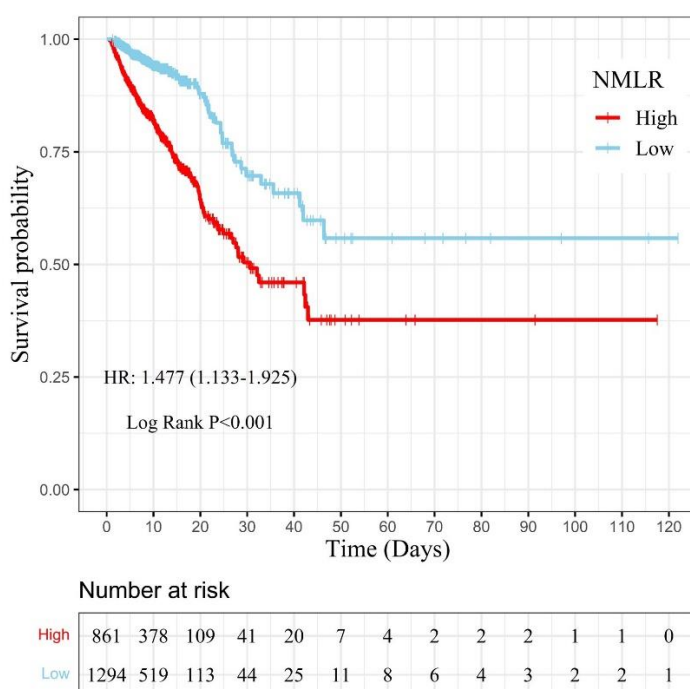

Supplementary Figure 3: Kaplan-Meier curve for samples with different admission NMLR levels.

The survival probability of samples in the high admission NMLR group (NMLR  $\geq 8.522$ ) is indicated by the solid red line, whereas that of samples in the low admission NMLR group (NMLR  $< 8.522$ ) is indicated by the solid blue line. Censors are indicated by “+”. The survival curve in the high admission NMLR group was significantly lower than that in the low admission NMLR group (Log-rank test:  $P < 0.001$ ). After adjusting for cofounders with a  $P$  value  $< 0.05$  in multivariate analysis, the Cox regression analysis showed that the high admission NMLR group was associated with an increased risk of in-hospital mortality compared to the low admission NMLR group (HR, 1.477; 95%CI, 1.133-1.925;  $P = 0.003$ ).

NMLR: (neutrophil + monocyte)/ lymphocyte ratio; HR: hazard ratio; CI: confidence interval.
